# Supplementary material for: Seasonal variability and long-term evolution of tropospheric composition in the tropics and Southern Hemisphere
Source: Copernicus journal article supplement (doi:10.5194/acp-14-4859-2014), 2014-05-19
Supplement: Supplementary file 1 [file acp-14-4859-2014-supplement.zip]

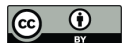

*Supplement of*

**Seasonal variability and long-term evolution of tropospheric composition in the tropics and Southern Hemisphere**

**K. M. Wai et al.**

*Correspondence to:* K. M. Wai (kwai@mtu.edu)

- Supplement-Cover-Letter.pdf
- Supplementary Material.tif
